# Supplementary material for: A single site mutation can induce functional promiscuity in homoserine kinase
Source: Royal Society of Chemistry journal article supplement (doi:10.1039/d3ob00459g), 2023-01-01
Supplement: d3ob00459g1.pdf [file d3ob00459g1.pdf]

## Supporting Information

### **A Single Site Mutation Can Induce a Functional Promiscuity in Homoserine Kinase**

Ankita Tripathi and Kshatresh Dutta Dubey\*

Department of Chemistry, School of Natural Sciences, Shiv Nadar Institution of Eminence, Gautam Buddha Nagar, Uttar Pradesh, 201314, India

\* Corresponding author: [kshatresh.dubey@snu.edu.in](mailto:kshatresh.dubey@snu.edu.in), [kshatresh@gmail.com](mailto:kshatresh@gmail.com)

#### **Table of Contents:**

**Figure S1:** a) QM/MM/B3LYP-D3/def2-SVP+ZPE calculated mechanism for phosphoryl transfer reaction catalysed by homoserine kinase complexed with the native substrate, L-homoserine for an previously proposed mechanism by Krishna and his co-workers. Key residues are shown by licorice model. b) A corresponding energy profile and barriers for the process are shown in the schematic diagram. The reported energy values are in kcal/mol. ....[PageS3]

**Figure S2:** a) Distance vs Simulation time plot between D23 and H138, D23 and R187 residues in representative snapshot from the most populated structure of the MD simulations of WT Homoserine kinase complexed with native substrate for 200 ns of simulation. b) Water occupancy vs. simulation time plot for WT and H138L homoserine kinase for 200 ns of simulation.....[PageS3]

**Figure S3:** The most prominent (on basis of the channel radii, i.e., thickness) water channel connecting the ATP in a)WT homoserine kinase b) H138L homoserine kinase complexed with native substrate. The position of D23, H138/L138 and ATP are highlighted.....[PageS4]

**Figure S4:** Representative snapshot from the most populated structure of the MD simulations of H138L homoserine kinase complexed with the native substrate, L-homoserine, showing the position of active residues. Distance vs. simulation time plot between respective residues highlighted in the figure for 200 ns of simulation.....[PageS4]

**Figure S5:** RMSD-plot for a)WT- homoserine kinase complexed with the native substrate, L-homoserine b) H138L homoserine kinase complexed with the native substrate, L-homoserine.....[PageS4-S5]

**Figure S6:** a) QM/MM/B3LYP-D3/def2-SVP+ZPE calculated mechanism for phosphoryl transfer reaction catalysed by homoserine kinase complexed with the native substrate, L-homoserine for an previously proposed mechanism by Krishna and his co-workers including H138 in the QM-region. Key residues are shown by licorice model. b) A corresponding energy profile and barriers for the process are shown in the schematic diagram. The reported energy values are in kcal/mol. ....[PageS5]

**Table1:** Potential energy barrier corresponding to different pathways proposed in WT and H138L Homoserine Kinase (HSK) .....[PageS5]

**Table2:** pKa value of Histidine in crystal structure.....[PageS5]

### **QM region Coordinates.**

QM region coordinates of a QM/MM optimised geometry of Homoserine kinase complexed with the native substrate (RC, TS, and PC) following the previous proposed pathway for phosphoryl transfer mechanism (Kinase Activity).

QM region coordinates of a QM/MM optimised geometry of Homoserine kinase complexed with the native substrate (RC, TS, IM, and PC) following a newly proposed pathway via H138 for phosphoryl transfer mechanism (Kinase Activity).

QM region coordinates of a QM/MM optimised geometry of H138L Homoserine kinase complexed with the native substrate (RC, TS, IM, and PC) following hydrolysis of ATP (ATPase Activity).

QM region coordinates of a QM/MM optimised geometry of Homoserine kinase complexed with the native substrate (RC, TS, and PC) following the previous proposed pathway for phosphoryl transfer mechanism (Kinase Activity) including H138 in the QM-region.

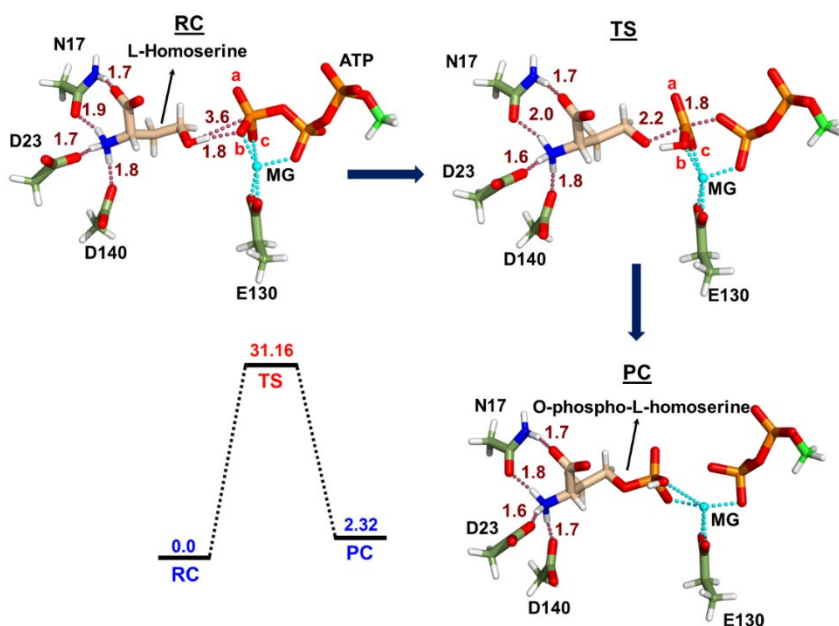

**Figure S1:** a) QM/MM/B3LYP-D3/def2-SVP+ZPE calculated mechanism for phosphoryl transfer reaction catalysed by homoserine kinase complexed with the native substrate, L-homoserine for previous proposed mechanism by Krishna and his co-workers. Key residues are shown by licorice model. b) A corresponding energy profile and barriers for the process are shown in the schematic diagram. The reported energy values are in kcal/mol.

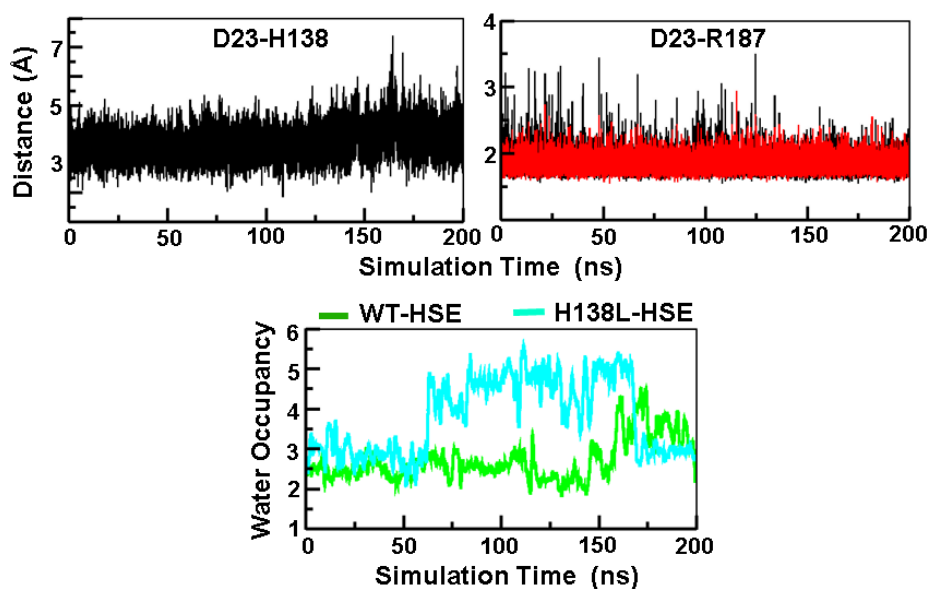

**Figure S2:** a) Distance vs Simulation time plot between D23 and H138, D23 and R187 residues in representative snapshot from the most populated structure of the MD simulations of WT Homoserine kinase complexed with native substrate for 200 ns of simulation. b) Water occupancy vs. simulation time plot for WT and H138L homoserine kinase for 200 ns of simulation

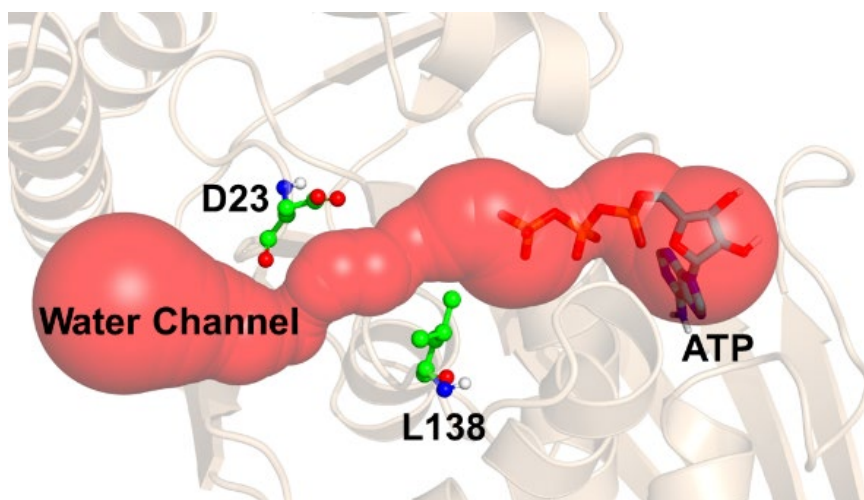

**Figure S3:** The most prominent (on basis of the channel radii, i.e., thickness) water channel connecting the ATP in H138L homoserine kinase complexed with native substrate. The position of D23, L138 and ATP are highlighted.

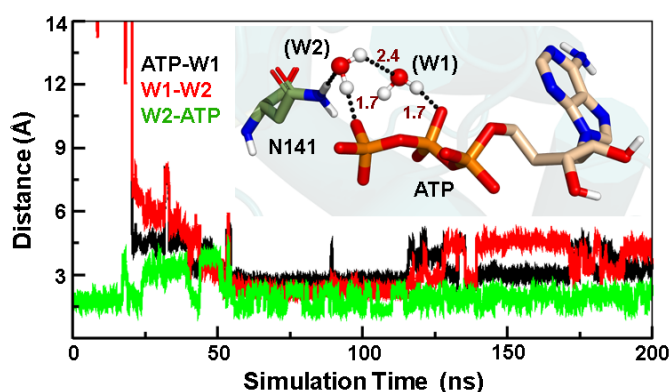

**Figure S4:** Representative snapshot from the most populated structure of the MD simulations of H138L homoserine kinase complexed with the native substrate, L- homoserine, showing the position of active residues. Distance vs. simulation time plot between respective residues highlighted in the figure for 200 ns of simulation.

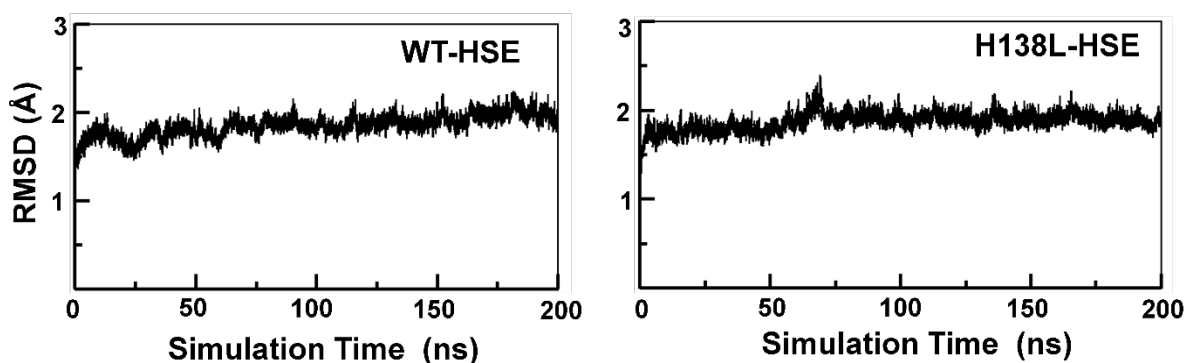

**Figure S5:** RMSD-plot for a) WT- homoserine kinase complexed with the native substrate, L-homoserine b) H138L homoserine kinase complexed with the native substrate, L- homoserine.

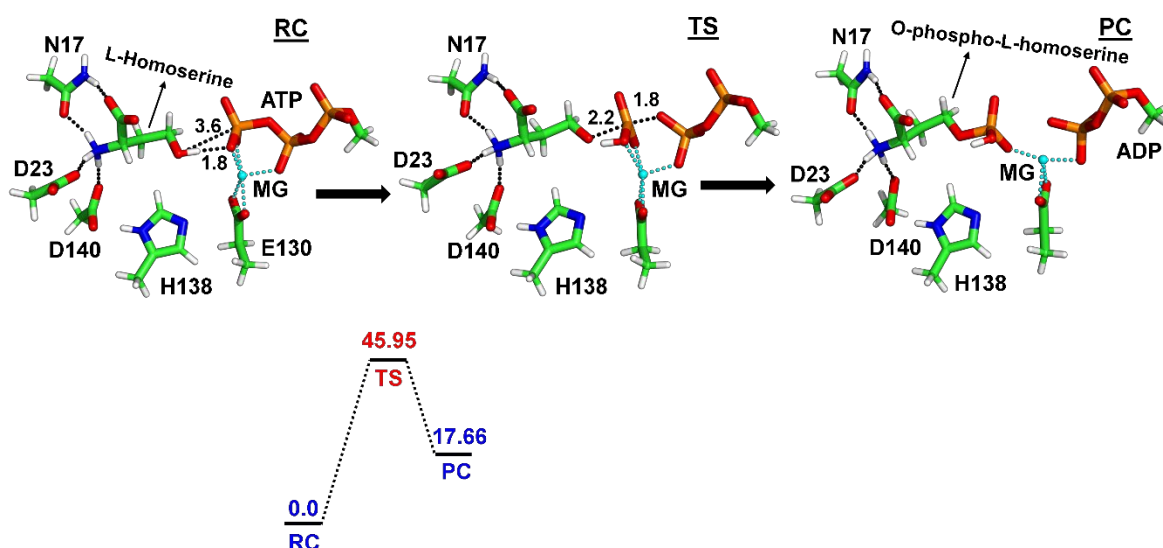

**Figure S6:** a) QM/MM/B3LYP-D3/def2-SVP+ZPE calculated mechanism for phosphoryl transfer reaction catalysed by homoserine kinase complexed with the native substrate, L-homoserine for an previously proposed mechanism by Krishna and his co-workers including H138 in the QM-region. Key residues are shown by licorice model. b) A corresponding energy profile and barriers for the process are shown in the schematic diagram. The reported energy values are in kcal/mol.

**Table1:** Potential energy barrier corresponding to different pathways proposed in WT and H138L Homoserine Kinase (HSK)

| Different Pathways                                                     | Energy Barrier (in kcal/mol) |
|------------------------------------------------------------------------|------------------------------|
| Already proposed pathway for phosphoryl transfer (without H138) in HSK | 31.16                        |
| Newly proposed pathway for phosphoryl transfer in HSK                  | 18.25                        |
| ATPase pathway in H138L HSK                                            | 22.45                        |

**Table2:** pKa value of Histidine in crystal structure

|         | pKa  |
|---------|------|
| His 138 | 4.01 |
| His 163 | 5.14 |

## QM-Optimised Coordinates

**WT-Homoserine**                      **kinase-previous**  
**proposed mechanism**

### **RC**

|    |            |            |            |
|----|------------|------------|------------|
| C  | 48.3156311 | 35.7826910 | 42.1493265 |
| H  | 48.7444337 | 34.8303254 | 41.8079858 |
| H  | 49.0310993 | 36.2448407 | 42.8515704 |
| C  | 47.0008620 | 35.5478012 | 42.8908525 |
| O  | 46.3100131 | 36.4889298 | 43.2935529 |
| N  | 46.6960607 | 34.2619030 | 43.0993533 |
| H  | 45.8625281 | 34.0741922 | 43.6844961 |
| H  | 47.3187329 | 33.5248162 | 42.7657132 |
| C  | 44.5505465 | 40.0263743 | 46.9744855 |
| H  | 45.3477732 | 40.4212547 | 47.6176322 |
| H  | 43.7035583 | 40.7283205 | 47.0770946 |
| C  | 44.0450404 | 38.6756188 | 47.5166307 |
| O  | 43.5764789 | 37.8278941 | 46.6913825 |
| O  | 44.0084297 | 38.5284462 | 48.7582681 |
| C  | 33.7438255 | 36.8401293 | 42.9909837 |
| H  | 33.3551779 | 37.8500257 | 42.8285270 |
| H  | 34.3057876 | 36.8568439 | 43.9374083 |
| C  | 34.6990764 | 36.4488259 | 41.8691170 |
| H  | 34.1914727 | 36.1922466 | 40.9228062 |
| H  | 35.3603034 | 37.2959922 | 41.6211611 |
| C  | 35.6163813 | 35.2924786 | 42.2084900 |
| O  | 36.4452660 | 34.8888441 | 41.3369915 |
| O  | 35.5507636 | 34.7094369 | 43.3320754 |
| C  | 42.3725391 | 40.8340730 | 41.5397938 |
| H  | 43.3221218 | 40.5879300 | 41.0409243 |
| H  | 42.4608782 | 41.8376812 | 41.9829677 |
| C  | 42.0953160 | 39.8072768 | 42.6603471 |
| O  | 41.4833100 | 40.2173404 | 43.6766478 |
| O  | 42.5371331 | 38.6372775 | 42.4819839 |
| Mg | 36.8672540 | 33.2758428 | 42.5542795 |
| P  | 38.6462549 | 31.3753817 | 42.5251306 |
| O  | 39.9916932 | 30.7163264 | 42.4939055 |
| O  | 38.2330147 | 32.2434595 | 43.7749424 |
| O  | 38.2299685 | 32.2789483 | 41.3183834 |
| P  | 35.9359431 | 30.3744175 | 42.0950667 |
| O  | 35.6570570 | 29.9968368 | 40.6561719 |
| O  | 35.5140849 | 31.7907624 | 42.5307034 |
| O  | 37.5022143 | 30.1422866 | 42.4636267 |
| P  | 35.3293478 | 27.7220449 | 43.3010365 |
| O  | 36.7421407 | 27.2366110 | 43.1783402 |
| O  | 34.5100962 | 27.3290782 | 44.5001439 |
| O  | 35.2035039 | 29.3697220 | 43.1412100 |

|   |            |            |            |
|---|------------|------------|------------|
| O | 34.5339678 | 27.2329112 | 41.9282931 |
| C | 33.2975771 | 27.7753013 | 41.5383754 |
| N | 43.5911189 | 36.7055503 | 44.2334834 |
| C | 42.7030963 | 35.5271655 | 44.4467785 |
| C | 43.4436759 | 34.3979012 | 45.1981057 |
| C | 42.1768126 | 34.9968843 | 43.1089929 |
| O | 42.7977692 | 33.7814719 | 46.0631144 |
| O | 44.6260837 | 34.1562738 | 44.8283809 |
| C | 41.1816540 | 33.8503396 | 43.2432924 |
| O | 40.0855217 | 34.2413974 | 44.0566757 |
| H | 39.4406189 | 33.4967432 | 44.0551393 |
| H | 43.1510657 | 37.4119958 | 43.5872106 |
| H | 43.7399692 | 37.1990442 | 45.1543283 |
| H | 44.5286774 | 36.4346615 | 43.8632172 |
| H | 40.8391115 | 33.5717262 | 42.2299396 |
| H | 41.6844163 | 32.9613585 | 43.6627016 |
| H | 41.7319808 | 35.8372899 | 42.5491405 |
| H | 43.0328846 | 34.6305016 | 42.5204213 |
| H | 41.8594102 | 35.8632027 | 45.0646386 |
| H | 48.2128374 | 36.4553212 | 41.2978166 |
| H | 44.8935331 | 40.0347974 | 45.9399052 |
| H | 32.9034862 | 36.1591177 | 43.1255945 |
| H | 41.6077450 | 40.9240112 | 40.7683871 |
| H | 33.3321044 | 28.8547178 | 41.3909476 |
| H | 33.0159922 | 27.3317502 | 40.5833678 |
| H | 32.4822385 | 27.5899034 | 42.2376020 |

### **TS**

|   |            |            |            |
|---|------------|------------|------------|
| C | 48.1775267 | 35.7743100 | 42.2284857 |
| H | 48.6020623 | 34.8178962 | 41.8953313 |
| H | 48.8896935 | 36.2290870 | 42.9387917 |
| C | 46.8486334 | 35.5518794 | 42.9571931 |
| O | 46.1508263 | 36.4888443 | 43.3496677 |
| N | 46.5437354 | 34.2633935 | 43.1762228 |
| H | 45.6831402 | 34.0716727 | 43.7162549 |
| H | 47.1673057 | 33.5256466 | 42.8483456 |
| C | 44.4626530 | 40.0100070 | 46.9943724 |
| H | 45.2825595 | 40.3083794 | 47.6620463 |
| H | 43.6748111 | 40.7745454 | 47.1156577 |
| C | 43.8432219 | 38.6932344 | 47.5138423 |
| O | 43.4200454 | 37.8348168 | 46.6647267 |
| O | 43.6915421 | 38.5844406 | 48.7450684 |
| C | 33.7243935 | 36.9016401 | 42.9614043 |
| H | 33.3375308 | 37.9208605 | 42.9069493 |
| H | 34.3559460 | 36.8462579 | 43.8598037 |
| C | 34.5994448 | 36.5882364 | 41.7542565 |
| H | 34.0409491 | 36.4006606 | 40.8214330 |

H 35.2596153 37.4446499 41.5351444  
 C 35.5085546 35.4036696 41.9960731  
 O 36.2083701 34.9325501 41.0512033  
 O 35.5530165 34.8758163 43.1488526  
 C 42.3545054 40.8420792 41.4724890  
 H 43.2954502 40.5741859 40.9688797  
 H 42.4602970 41.8484983 41.9057076  
 C 42.0570441 39.8365881 42.6059776  
 O 41.4483047 40.2792356 43.6116277  
 O 42.4658052 38.6530001 42.4484728  
 Mg 36.7376836 33.4108984 42.3938310  
 P 38.9118666 31.8215846 42.5515263  
 O 40.1503398 30.9819676 42.4672298  
 O 38.2574124 32.4701543 43.9518292  
 O 38.2326495 32.5722734 41.3680278  
 P 36.1769983 30.4755454 42.1914300  
 O 35.9298427 30.0436504 40.7568979  
 O 35.5526278 31.8470106 42.5755597  
 O 37.7191965 30.4748879 42.6013840  
 P 35.4764217 27.7675129 43.3319972  
 O 36.8628831 27.2072908 43.2123941  
 O 34.6247396 27.3763021 44.5111975  
 O 35.4638680 29.4169137 43.2193971  
 O 34.6641980 27.3229802 41.9508094  
 C 33.4394558 27.8931978 41.5717933  
 N 43.3043192 36.6374292 44.2511648  
 C 42.4298239 35.4206282 44.3230081  
 C 43.1385808 34.3127557 45.1386604  
 C 42.1401916 34.9367061 42.8969063  
 O 42.4856417 33.7533003 46.0453256  
 O 44.3204212 34.0392775 44.8001742  
 C 41.3687961 33.6193038 42.6907026  
 O 40.0238976 33.6182709 43.0289779  
 H 39.0069993 33.1698351 44.0587828  
 H 42.9114950 37.3675396 43.6009920  
 H 43.4204205 37.1098842 45.1932596  
 H 44.2611488 36.3950453 43.9195545  
 H 41.4792300 33.4154489 41.6039807  
 H 41.9311010 32.8094668 43.2019769  
 H 41.6576017 35.7572272 42.3404106  
 H 43.1301097 34.7832497 42.4362950  
 H 41.5075291 35.7089228 44.8477797  
 H 48.1037769 36.4425161 41.3705062  
 H 44.8221046 40.0192987 45.9654043  
 H 32.9007868 36.2030180 43.1085988  
 H 41.5810273 40.9338296 40.7100057  
 H 33.4963768 28.9766837 41.4674605

H 33.1597026 27.4885836 40.5991204  
 H 32.6122116 27.6941887 42.2530639

**PC**

C 48.3669293 35.8272061 42.1586156  
 H 48.7640586 34.8647110 41.8092630  
 H 49.1164934 36.2817586 42.8301334  
 C 47.0862122 35.6272943 42.9611065  
 O 46.4356363 36.5857044 43.3859167  
 N 46.7678686 34.3487458 43.2048302  
 H 45.9588107 34.1871649 43.8268213  
 H 47.3650138 33.5952324 42.8613820  
 C 44.5940459 40.1524559 47.1493090  
 H 45.4321957 40.4465887 47.7956689  
 H 43.8246271 40.9337626 47.2793739  
 C 43.9630758 38.8533934 47.6995387  
 O 43.5964959 37.9573473 46.8645730  
 O 43.7517505 38.7756793 48.9263925  
 C 33.7819765 36.7584687 42.8948152  
 H 33.4343860 37.7959691 42.7941553  
 H 34.4350119 36.7050359 43.7788135  
 C 34.5962873 36.3214479 41.6752721  
 H 33.9930408 36.1875605 40.7615996  
 H 35.3359976 37.1036501 41.4304015  
 C 35.4020351 35.0430877 41.8879626  
 O 35.9150496 34.4705734 40.8772971  
 O 35.5467618 34.5796294 43.0509142  
 C 42.3589677 40.7927671 41.4703740  
 H 43.2938136 40.5197344 40.9575538  
 H 42.4544770 41.8213756 41.8524763  
 C 42.1277688 39.8420327 42.6621377  
 O 41.4819968 40.2822288 43.6418135  
 O 42.6439557 38.6899721 42.5802440  
 Mg 36.6144339 32.9564315 42.2131036  
 P 39.5980654 32.9755147 43.0261673  
 O 40.3273979 31.7454513 42.5337582  
 O 38.9935699 32.7714689 44.5266530  
 O 38.4843109 33.5911605 42.1940772  
 P 35.8690086 30.4501232 42.0754064  
 O 35.7179443 29.8035320 40.6966713  
 O 34.9985522 31.7315495 42.2647952  
 O 37.2845872 30.9479917 42.4551510  
 P 35.4115765 27.7599885 43.3359678  
 O 36.8189259 27.2425954 43.1903975  
 O 34.6120060 27.3192198 44.5388524  
 O 35.3067009 29.3838076 43.2225129  
 O 34.5920680 27.2494570 41.9749457

|   |            |            |            |
|---|------------|------------|------------|
| C | 33.3615918 | 27.7992071 | 41.5864089 |
| N | 43.7979723 | 36.9459310 | 44.4198025 |
| C | 42.9344188 | 35.7354895 | 44.3975650 |
| C | 43.5265765 | 34.5881037 | 45.2451035 |
| C | 42.7921703 | 35.2906476 | 42.9394135 |
| O | 42.7655454 | 34.0002770 | 46.0495956 |
| O | 44.7252773 | 34.2861385 | 45.0241070 |
| C | 42.0069457 | 34.0114064 | 42.7357575 |
| O | 40.7096501 | 34.1670964 | 43.3023872 |
| H | 39.4805127 | 33.2545082 | 45.2449078 |
| H | 43.3725844 | 37.6672238 | 43.7775260 |
| H | 43.8473089 | 37.3765516 | 45.3914263 |
| H | 44.7601288 | 36.7222930 | 44.0818288 |
| H | 41.9354593 | 33.8015466 | 41.6553225 |
| H | 42.5189212 | 33.1480919 | 43.1941985 |
| H | 42.3475037 | 36.1180972 | 42.3623127 |
| H | 43.8113046 | 35.1252127 | 42.5539063 |
| H | 41.9570135 | 36.0165688 | 44.8120786 |
| H | 48.2459592 | 36.4947912 | 41.3055250 |
| H | 44.9325629 | 40.1399625 | 46.1132988 |
| H | 32.9153141 | 36.1268460 | 43.0897925 |
| H | 41.5664649 | 40.8377975 | 40.7233943 |
| H | 33.3878755 | 28.8809415 | 41.4551570 |
| H | 33.0836430 | 27.3728942 | 40.6225267 |
| H | 32.5400013 | 27.6026981 | 42.2752053 |

**WT-Homoserine kinase-Newly proposed mechanism including H138**

**RC**

|   |            |            |            |
|---|------------|------------|------------|
| C | 45.1156788 | 29.4604731 | 28.1686789 |
| H | 44.0604300 | 29.3227294 | 27.8970619 |
| H | 45.7276951 | 29.0696030 | 27.3374225 |
| C | 45.4540912 | 28.6778899 | 29.4330809 |
| O | 46.5577162 | 28.7746794 | 29.9766842 |
| N | 44.4869754 | 27.8672442 | 29.8841910 |
| H | 44.7508240 | 27.2289733 | 30.6615224 |
| H | 43.6203133 | 27.7499273 | 29.3707204 |
| C | 51.2750544 | 27.5132177 | 31.2242817 |
| H | 51.8706561 | 27.2429419 | 30.3428070 |
| H | 51.9776334 | 27.7105783 | 32.0535699 |
| C | 50.4619722 | 26.2969204 | 31.6857215 |
| O | 49.4792194 | 26.4986971 | 32.4926066 |
| O | 50.8661337 | 25.1725233 | 31.3702838 |
| C | 47.3299485 | 28.8999747 | 42.1724191 |
| H | 48.1103883 | 29.6011836 | 42.5022405 |
| H | 47.8198850 | 28.1422509 | 41.5434666 |

|    |            |            |            |
|----|------------|------------|------------|
| C  | 46.2506502 | 29.6119307 | 41.3504863 |
| H  | 45.5491743 | 30.2051960 | 41.9619522 |
| H  | 46.7141826 | 30.3402647 | 40.6703887 |
| C  | 45.4100375 | 28.7002193 | 40.4700955 |
| O  | 44.3883163 | 29.1634681 | 39.8768469 |
| O  | 45.7183378 | 27.4757897 | 40.3332733 |
| C  | 50.8378309 | 28.3507805 | 38.1891923 |
| H  | 51.5608392 | 28.2914125 | 37.3641173 |
| H  | 50.8038245 | 27.3443379 | 38.6362387 |
| C  | 49.4895884 | 28.7326664 | 37.6754671 |
| N  | 49.3031071 | 29.4793378 | 36.5298464 |
| H  | 49.9991369 | 29.8230170 | 35.8439850 |
| C  | 47.9798000 | 29.7344368 | 36.4192395 |
| H  | 47.5740004 | 30.2863183 | 35.5741980 |
| N  | 47.2958310 | 29.1993745 | 37.4191292 |
| C  | 48.2266066 | 28.5565619 | 38.2043296 |
| H  | 47.9356971 | 27.9932829 | 39.0896236 |
| C  | 49.3333957 | 32.9839842 | 33.9593005 |
| H  | 48.6085876 | 33.2347998 | 33.1721220 |
| H  | 50.3111824 | 33.4226315 | 33.7062558 |
| C  | 49.5348220 | 31.4586768 | 34.0594014 |
| O  | 48.6319705 | 30.7182694 | 33.6056106 |
| O  | 50.5991877 | 31.0591935 | 34.6255173 |
| Mg | 43.9173752 | 27.1732730 | 39.3628530 |
| P  | 42.3966443 | 26.0151902 | 37.6341018 |
| O  | 41.8562302 | 25.6760914 | 36.2768958 |
| O  | 43.7956678 | 25.5280161 | 38.1088291 |
| O  | 42.3641625 | 27.5271257 | 38.0774433 |
| P  | 41.3991456 | 25.5504840 | 40.3548500 |
| O  | 40.1454246 | 26.2489907 | 40.8248279 |
| O  | 42.7354106 | 26.2388001 | 40.7430218 |
| O  | 41.3276996 | 25.3109373 | 38.7454916 |
| P  | 40.3518996 | 22.8582084 | 40.8695776 |
| O  | 39.7634833 | 22.7749067 | 39.4980607 |
| O  | 40.9128474 | 21.6537491 | 41.5551367 |
| O  | 41.5225666 | 24.0521335 | 40.9548201 |
| O  | 39.1798777 | 23.5335727 | 41.8529189 |
| C  | 39.4291297 | 24.1023829 | 43.1074819 |
| N  | 47.3874472 | 28.0832844 | 32.6593369 |
| C  | 46.4862768 | 27.3356991 | 33.5880237 |
| C  | 45.9294517 | 26.0789653 | 32.8712789 |
| C  | 45.3505533 | 28.2343932 | 34.0992100 |
| O  | 45.6541682 | 26.2131761 | 31.6406035 |
| O  | 45.7596323 | 25.0516047 | 33.5427552 |
| C  | 44.6127027 | 27.6901516 | 35.3302947 |
| O  | 45.4558610 | 27.3972577 | 36.4187064 |
| H  | 45.9186414 | 28.1954334 | 36.7535867 |
| H  | 47.7077960 | 28.9870166 | 33.0503990 |



H 48.2743793 27.5008027 32.4874315  
H 46.9399418 28.2507757 31.7316521  
H 43.8251259 28.4157482 35.6071101  
H 44.0975148 26.7539037 35.0688685  
H 45.7683151 29.2313080 34.3323136  
H 44.6141251 28.3782481 33.2912391  
H 47.0901887 27.0075325 34.4455176  
H 45.3321334 30.5229482 28.2798599  
H 50.7212823 28.4282239 31.0141214  
H 46.9182536 28.4126682 43.0562216  
H 51.2541238 29.0282729 38.9346931  
H 49.0368959 33.4619050 34.8929743  
H 40.2278652 24.8438900 43.0914832  
H 38.5337623 24.6282435 43.4389257  
H 39.6928882 23.4027384 43.9005748

### TS

C 45.0157405 29.2964049 28.3233901  
H 43.9393347 29.1802893 28.1428108  
H 45.5522599 28.8622274 27.4619683  
C 45.4629516 28.5515756 29.5754734  
O 46.6289082 28.6301957 29.9760988  
N 44.5456162 27.7919341 30.1918815  
H 44.8929066 27.1696339 30.9582601  
H 43.6145449 27.6539848 29.8070971  
C 51.3314486 27.4331859 31.1611359  
H 51.9084027 27.1777282 30.2628537  
H 52.0553033 27.6209779 31.9738059  
C 50.5418364 26.2004560 31.6333557  
O 49.5286247 26.3908016 32.4009024  
O 50.9864066 25.0772028 31.3690626  
C 47.3425113 28.9326734 42.1889815  
H 48.1353304 29.6170113 42.5236989  
H 47.8082521 28.1872847 41.5288755  
C 46.2478945 29.6707536 41.4130788  
H 45.5952665 30.2904295 42.0512505  
H 46.6979507 30.3761896 40.6995686  
C 45.3463968 28.7483748 40.6044650  
O 44.2561009 29.1729858 40.1268142  
O 45.6987772 27.5388841 40.4271756  
C 50.5784879 28.2694647 38.2497861  
H 51.2825726 28.1146143 37.4174726  
H 50.4993386 27.2929854 38.7533481  
C 49.2379266 28.6364593 37.6995217  
N 49.0800359 29.3715768 36.5433283  
H 49.8008165 29.7700047 35.9188701  
C 47.7567423 29.4499905 36.2823155

H 47.3889555 29.9819448 35.4093351  
N 47.0378298 28.8096920 37.1934379  
C 47.9555393 28.2977450 38.0904408  
H 47.6406747 27.6986968 38.9439917  
C 49.3143332 32.9519741 33.9687684  
H 48.6061946 33.2171047 33.1713276  
H 50.3061536 33.3654679 33.7268632  
C 49.4773420 31.4228568 34.0763434  
O 48.5762911 30.7076748 33.5739273  
O 50.5041089 30.9925953 34.6813317  
Mg 43.8772044 27.0905671 39.6121479  
P 43.4864441 26.2992331 37.1473515  
O 42.7869912 25.7096783 35.9744440  
O 44.4552746 25.5763352 38.0882911  
O 43.0678923 27.6260828 37.7952682  
P 41.4241816 25.5117657 40.1620940  
O 40.1244039 26.1590437 40.6373718  
O 42.6887913 26.2152502 40.8512690  
O 41.6388658 25.4056644 38.6517575  
P 40.3706590 22.8479059 40.8255800  
O 39.7512734 22.7166840 39.4668303  
O 40.9021331 21.6417960 41.5459746  
O 41.5348061 24.0085206 40.8630221  
O 39.1854118 23.5276692 41.8112701  
C 39.4607568 24.1302578 43.0395538  
N 47.5843720 28.1124660 32.5853998  
C 46.6659080 27.4932221 33.5745856  
C 46.1566542 26.1078734 33.0952504  
C 45.4959885 28.4303235 33.8666403  
O 45.7102792 26.0489784 31.9066020  
O 46.1761242 25.1879798 33.9258405  
C 44.4622855 27.8694429 34.8332384  
O 44.9985555 27.2602875 36.0148792  
H 45.5903503 27.8805509 36.5388392  
H 47.9457218 29.0227763 32.9324380  
H 48.4390050 27.4640155 32.4388392  
H 47.1345073 28.2559994 31.6557887  
H 43.7455555 28.6611479 35.1102246  
H 43.9034926 27.0658287 34.3417117  
H 45.8808109 29.4043965 34.2080783  
H 44.9594852 28.6199253 32.9220350  
H 47.2488417 27.3374618 34.4889524  
H 45.2708225 30.3543610 28.3844574  
H 50.7697470 28.3489462 30.9769041  
H 46.9314160 28.4265724 43.0624399  
H 51.0640812 28.9561766 38.9431064  
H 49.0189001 33.4413044 34.8968537  
H 40.2728395 24.8552715 42.9852956

H 38.5816056 24.6816059 43.3729838  
H 39.7192291 23.4490610 43.8502511

## IM

C 45.0294424 29.3128777 28.2645896  
H 43.9542592 29.1929789 28.0801386  
H 45.5712447 28.9004292 27.3956835  
C 45.4798243 28.5423329 29.4976789  
O 46.6504952 28.6093503 29.8907117  
N 44.5645353 27.7731438 30.1009239  
H 44.9121675 27.1292899 30.8483111  
H 43.6191381 27.6669961 29.7407980  
C 51.3510397 27.4123339 31.1535037  
H 51.9240075 27.1643789 30.2506162  
H 52.0808485 27.5992252 31.9609637  
C 50.5765704 26.1716980 31.6315889  
O 49.5543222 26.3551150 32.3849980  
O 51.0440518 25.0532182 31.3830363  
C 47.2545865 28.9393946 42.1706098  
H 48.0597219 29.6249377 42.4766863  
H 47.6943706 28.2047295 41.4813048  
C 46.1162678 29.6847024 41.4608180  
H 45.4442285 30.2133585 42.1615510  
H 46.5100059 30.4869061 40.8188582  
C 45.2281223 28.7892075 40.5988102  
O 44.4090161 29.3128188 39.7832322  
O 45.3197772 27.5373122 40.7101240  
C 50.8538814 28.4042088 38.0787211  
H 51.1817421 28.7926863 37.1075484  
H 51.3570260 27.4327601 38.2064412  
C 49.3699804 28.2326150 38.0209768  
N 48.6368571 28.8760008 37.0387424  
H 49.0316054 29.5145505 36.2786842  
C 47.3670075 28.4883086 37.1223188  
H 46.5505945 28.7414236 36.4511241  
N 47.2446319 27.6286458 38.1329154  
C 48.4797784 27.4416307 38.7124920  
H 48.6288985 26.7580167 39.5452904  
C 49.2267048 32.6238903 34.1292251  
H 48.6615464 32.9543308 33.2475418  
H 50.3041227 32.7710549 33.9379445  
C 48.9813112 31.1249296 34.3929234  
O 48.1042727 30.5510992 33.7117153  
O 49.6842847 30.5592863 35.2908880  
Mg 43.6990888 27.2857516 39.3868556  
P 43.9706649 26.6131426 36.8241190  
O 43.3238158 25.4891855 36.0387111

O 44.9427486 26.2181662 38.0096314  
O 43.0403100 27.6506540 37.5027868  
P 40.8605886 26.0787628 40.1382680  
O 39.6877236 26.7324826 40.8862685  
O 42.1877093 26.8994755 40.4852441  
O 40.6739364 25.8849595 38.6438276  
P 40.5774240 23.1270241 40.9073691  
O 39.9781465 22.6414070 39.6184524  
O 41.5168537 22.2660730 41.7063791  
O 41.2640853 24.6145773 40.8179855  
O 39.2511307 23.4941140 41.8930280  
C 39.4454347 24.1052706 43.1351551  
N 47.5618746 28.0562407 32.4952641  
C 46.5931442 27.4577292 33.4443342  
C 46.1334517 26.0595817 32.9696539  
C 45.4106093 28.4094740 33.6241616  
O 45.7323752 25.9830760 31.7671779  
O 46.1576463 25.1388453 33.8016541  
C 44.3398383 27.8520324 34.5363601  
O 44.9254724 27.4938397 35.7872515  
H 46.3547304 27.0652667 38.2595114  
H 47.8599008 28.9792816 32.8724632  
H 48.4257569 27.4270742 32.3951115  
H 47.1488966 28.1899420 31.5473585  
H 43.5390379 28.5965366 34.6932904  
H 43.8824620 26.9588092 34.0842691  
H 45.7886974 29.3765467 33.9965223  
H 44.9514620 28.5929839 32.6387115  
H 47.1150730 27.3295014 34.3996343  
H 45.2784277 30.3708228 28.3472079  
H 50.7811810 28.3245569 30.9769321  
H 46.8949397 28.4212095 43.0595448  
H 51.2627044 29.0529904 38.8533264  
H 48.9898950 33.2671742 34.9766767  
H 40.2329572 24.8588283 43.1300343  
H 38.5337553 24.6203250 43.4378540  
H 39.7013898 23.4152148 43.9391309

## PC

C 45.0291304 29.3122983 28.2459052  
H 43.9544745 29.1919864 28.0580896  
H 45.5742962 28.9042942 27.3770359  
C 45.4768105 28.5376758 29.4778807  
O 46.6462494 28.5968970 29.8714542  
N 44.5554946 27.7730456 30.0805863  
H 44.8986394 27.1351043 30.8357394  
H 43.6127824 27.6686415 29.7147952

|    |            |            |            |
|----|------------|------------|------------|
| C  | 51.3550115 | 27.4152182 | 31.1439330 |
| H  | 51.9363809 | 27.1764000 | 30.2440375 |
| H  | 52.0767704 | 27.5968241 | 31.9597733 |
| C  | 50.5777749 | 26.1678611 | 31.6009967 |
| O  | 49.5502154 | 26.3412568 | 32.3490953 |
| O  | 51.0476898 | 25.0528104 | 31.3419448 |
| C  | 47.1098740 | 28.8665373 | 42.1126075 |
| H  | 47.8945276 | 29.6023585 | 42.3521581 |
| H  | 47.5540924 | 28.1182364 | 41.4411620 |
| C  | 45.9150557 | 29.5200637 | 41.3989518 |
| H  | 45.2698938 | 30.1042035 | 42.0787017 |
| H  | 46.2691795 | 30.2549060 | 40.6569417 |
| C  | 45.0029462 | 28.5573277 | 40.6309538 |
| O  | 43.9510956 | 29.0135873 | 40.0813554 |
| O  | 45.3051479 | 27.3384509 | 40.5370678 |
| C  | 50.8336159 | 28.4021728 | 38.0855692 |
| H  | 51.2238711 | 28.7447717 | 37.1188297 |
| H  | 51.2793714 | 27.4086585 | 38.2553635 |
| C  | 49.3441001 | 28.3123944 | 37.9746644 |
| N  | 48.6867364 | 28.9739099 | 36.9583066 |
| H  | 49.1218506 | 29.5536630 | 36.2006305 |
| C  | 47.3844419 | 28.6424835 | 37.0227010 |
| H  | 46.6374675 | 28.9582884 | 36.3010481 |
| N  | 47.1510179 | 27.8114373 | 38.0293300 |
| C  | 48.3665843 | 27.5954119 | 38.6400042 |
| H  | 48.4703897 | 26.9340720 | 39.4997181 |
| C  | 49.1716562 | 32.7017284 | 34.0564843 |
| H  | 48.5631760 | 33.0364011 | 33.2052047 |
| H  | 50.2341863 | 32.9098740 | 33.8403213 |
| C  | 49.0214714 | 31.1799475 | 34.2617649 |
| O  | 48.1572356 | 30.5894264 | 33.5705844 |
| O  | 49.7775882 | 30.6200238 | 35.1084956 |
| Mg | 43.4766785 | 26.9628486 | 39.4975775 |
| P  | 43.9929719 | 26.7022672 | 36.7344519 |
| O  | 43.3214284 | 25.5743532 | 35.9895832 |
| O  | 45.1305955 | 26.2055704 | 37.7773085 |
| O  | 43.1232032 | 27.6374855 | 37.5886377 |
| P  | 41.4609137 | 25.4718576 | 40.3865308 |
| O  | 40.0625179 | 26.0210506 | 40.6395366 |
| O  | 42.5969101 | 26.2363904 | 41.1783198 |
| O  | 41.9873737 | 25.5028873 | 38.9340215 |
| P  | 40.3790665 | 22.8007217 | 40.8349476 |
| O  | 39.8156128 | 22.7610880 | 39.4458110 |
| O  | 40.8664401 | 21.5465764 | 41.4992843 |
| O  | 41.5612348 | 23.9378983 | 40.9869928 |
| O  | 39.1855670 | 23.4597550 | 41.8234300 |
| C  | 39.4370145 | 24.0597507 | 43.0583279 |
| N  | 47.5833442 | 28.0669818 | 32.4895404 |

|   |            |            |            |
|---|------------|------------|------------|
| C | 46.5849973 | 27.5051288 | 33.4292486 |
| C | 46.1126818 | 26.1015784 | 32.9832813 |
| C | 45.4159486 | 28.4838877 | 33.5450816 |
| O | 45.6980981 | 26.0049140 | 31.7859161 |
| O | 46.1368165 | 25.1949984 | 33.8311378 |
| C | 44.3031709 | 27.9706306 | 34.4319381 |
| O | 44.8538662 | 27.6441423 | 35.7070234 |
| H | 45.9131363 | 26.9105096 | 37.9552678 |
| H | 47.9011648 | 28.9906931 | 32.8614207 |
| H | 48.4346869 | 27.4189967 | 32.3967965 |
| H | 47.1793014 | 28.2008739 | 31.5392872 |
| H | 43.5107194 | 28.7313486 | 34.5468475 |
| H | 43.8457196 | 27.0700962 | 33.9931929 |
| H | 45.8009358 | 29.4500458 | 33.9121365 |
| H | 44.9962397 | 28.6561555 | 32.5405356 |
| H | 47.0787843 | 27.3964844 | 34.4019990 |
| H | 45.2763580 | 30.3702922 | 28.3330522 |
| H | 50.7848049 | 28.3278617 | 30.9706890 |
| H | 46.8196790 | 28.3769907 | 43.0422301 |
| H | 51.2546805 | 29.0486165 | 38.8555577 |
| H | 48.9332401 | 33.3012755 | 34.9349876 |
| H | 40.2384398 | 24.7979698 | 43.0297419 |
| H | 38.5464121 | 24.5953870 | 43.3869434 |
| H | 39.6995808 | 23.3796693 | 43.8686460 |

**H138L-Homoserine kinase-ATPase activity**

**RC**

|   |            |            |            |
|---|------------|------------|------------|
| C | 46.5235034 | 40.2308290 | 40.5135167 |
| H | 46.8838282 | 41.0417641 | 39.8688956 |
| H | 47.3575284 | 39.5322690 | 40.6289096 |
| C | 45.3593165 | 39.4795005 | 39.8738850 |
| H | 44.4375424 | 40.0766747 | 39.7891807 |
| H | 45.6459896 | 39.1729424 | 38.8517823 |
| C | 45.0181134 | 38.1981687 | 40.6029411 |
| O | 43.8825484 | 37.6586115 | 40.4954270 |
| O | 45.8989988 | 37.6572237 | 41.3545303 |
| C | 44.4597423 | 35.2129845 | 37.3615443 |
| H | 45.3711260 | 34.7712208 | 37.7859357 |
| H | 44.2527803 | 36.1268357 | 37.9453428 |
| C | 43.3165070 | 34.2066361 | 37.5612789 |
| O | 43.4809161 | 33.1631071 | 38.1940262 |
| N | 42.1197840 | 34.5329325 | 37.0188148 |
| H | 41.3847877 | 33.8199830 | 36.9879976 |
| H | 42.0423854 | 35.3473177 | 36.4096149 |

C 45.3390228 29.1505875 43.3516765  
 H 45.6877425 28.7755317 44.3305472  
 H 46.1679719 29.7390972 42.9262478  
 O 44.1613533 29.9209445 43.4866834  
 H 44.3804128 30.8445472 43.2321829  
 Mg 44.5576753 36.2625950 41.9529568  
 P 44.3987111 33.7599692 42.5907191  
 O 44.8182927 32.2783296 42.4525424  
 O 45.6733974 34.6681089 42.6598189  
 O 43.5371885 34.4959018 41.5272263  
 P 43.1595454 35.4377948 44.6153167  
 O 41.6525429 35.4728723 44.6406299  
 O 43.8523224 36.5587439 43.8194355  
 O 43.7175346 33.9927020 44.1085489  
 P 43.2943001 34.7960405 47.5289976  
 O 43.2430063 33.3035452 47.3790137  
 O 44.0955365 35.4416156 48.6398461  
 O 43.7623447 35.5452091 46.1285144  
 O 41.7126268 35.2991834 47.6644260  
 C 41.2706665 36.6256262 47.4989265  
 N 49.4466751 30.9300213 38.6963283  
 C 48.6935213 31.1813606 39.9730653  
 C 48.8546369 29.9872831 40.9472781  
 C 47.1887253 31.3744985 39.7492557  
 O 48.8185677 28.8369005 40.4357901  
 O 48.9110090 30.2784023 42.1567155  
 C 46.7784761 32.4319545 38.7336774  
 O 47.3287331 33.7010528 39.0481912  
 H 47.8493152 34.0563934 38.2649810  
 H 49.2419994 31.6224108 37.9401355  
 H 50.4826922 30.9523497 38.8405048  
 H 49.2284247 29.9902436 38.3145016  
 H 47.0913524 32.1263541 37.7230857  
 H 45.6779374 32.4964213 38.7247699  
 H 46.7364071 30.4099730 39.4592936  
 H 46.7648249 31.6360107 40.7322318  
 H 49.1083787 32.0923144 40.4232179  
 O 48.1171290 34.3969753 41.6115149  
 H 47.2509654 34.4236818 42.0936450  
 H 47.8463754 34.1539119 40.7017874  
 O 43.5897885 31.2377809 40.6525582  
 H 44.2146609 31.6652625 41.3720768  
 H 43.5640150 31.9043712 39.9436751  
 O 41.0758723 35.6660072 41.9576724  
 H 41.1677269 35.5876453 42.9303182  
 H 41.8181055 35.0994126 41.6566238  
 O 42.2166725 32.5220665 42.5922658  
 H 42.5277984 31.9009160 41.8361173

H 42.3143035 32.0146337 43.4104183  
 H 46.2721584 40.6574881 41.4845239  
 H 44.6476465 35.4663851 36.3182096  
 H 45.1931442 28.2988791 42.6873125  
 H 41.6992341 37.1236486 46.6292308  
 H 40.1901146 36.6269585 47.3558428  
 H 41.4912773 37.2756849 48.3455797

## TS

C 46.5324941 40.2150136 40.5251326  
 H 46.8920731 41.0218517 39.8749283  
 H 47.3676360 39.5189438 40.6466675  
 C 45.3724345 39.4545577 39.8902741  
 H 44.4490653 40.0486200 39.8008339  
 H 45.6608995 39.1429577 38.8703039  
 C 45.0290745 38.1772381 40.6270683  
 O 43.8898099 37.6500368 40.5320890  
 O 45.9150104 37.6274641 41.3705456  
 C 44.4623300 35.2031707 37.3725040  
 H 45.3745807 34.7634306 37.7966768  
 H 44.2522952 36.1153685 37.9577636  
 C 43.3208278 34.1942699 37.5682497  
 O 43.4917216 33.1420709 38.1875353  
 N 42.1223284 34.5241724 37.0361057  
 H 41.3862519 33.8120510 37.0023065  
 H 42.0410021 35.3455796 36.4367997  
 C 45.3459268 29.1406626 43.3742117  
 H 45.7024906 28.7573041 44.3460779  
 H 46.1694810 29.7353198 42.9468881  
 O 44.1671144 29.9083568 43.5280952  
 H 44.3821347 30.8288542 43.2871375  
 Mg 44.5794299 36.2284206 41.9733614  
 P 44.2011354 33.7155794 42.5208353  
 O 44.8175787 32.2385735 42.2875802  
 O 45.5457307 34.5434156 42.6694001  
 O 43.4788205 34.5559981 41.4305685  
 P 43.1292174 35.4157532 44.6157066  
 O 41.6247235 35.4954991 44.6578712  
 O 43.8468662 36.5246741 43.8253074  
 O 43.6223560 33.9500314 44.0855896  
 P 43.2859288 34.7826158 47.5383691  
 O 43.2271327 33.2880158 47.4164581  
 O 44.0957919 35.4435771 48.6342645  
 O 43.7572280 35.4952681 46.1200261  
 O 41.7094409 35.2974463 47.6690672  
 C 41.2761925 36.6272366 47.5032829  
 N 49.4612484 30.9261620 38.6856802

|   |            |            |            |    |            |            |            |
|---|------------|------------|------------|----|------------|------------|------------|
| C | 48.7016331 | 31.1792952 | 39.9574245 | H  | 44.2414551 | 36.0910672 | 37.9558673 |
| C | 48.8623374 | 29.9906366 | 40.9390855 | C  | 43.2818809 | 34.1910257 | 37.5367561 |
| C | 47.1978293 | 31.3631264 | 39.7230420 | O  | 43.4403319 | 33.1209854 | 38.1309141 |
| O | 48.8202855 | 28.8380028 | 40.4336578 | N  | 42.0846344 | 34.5467767 | 37.0214944 |
| O | 48.9233016 | 30.2883982 | 42.1470081 | H  | 41.3435781 | 33.8398014 | 36.9799678 |
| C | 46.7866895 | 32.4244324 | 38.7110341 | H  | 42.0106712 | 35.3765475 | 36.4320341 |
| O | 47.3337114 | 33.6925974 | 39.0330075 | C  | 45.3698430 | 29.0683463 | 43.3441280 |
| H | 47.8611924 | 34.0511709 | 38.2552866 | H  | 45.7157018 | 28.6976770 | 44.3246383 |
| H | 49.2584512 | 31.6170324 | 37.9273668 | H  | 46.1966374 | 29.6594413 | 42.9179325 |
| H | 50.4965833 | 30.9507299 | 38.8348408 | O  | 44.1885429 | 29.8378375 | 43.4757353 |
| H | 49.2454817 | 29.9853993 | 38.3043108 | H  | 44.3928370 | 30.7470087 | 43.1826949 |
| H | 47.1027295 | 32.1241863 | 37.7000261 | Mg | 44.6266385 | 36.0811932 | 41.9982271 |
| H | 45.6858368 | 32.4888961 | 38.6989967 | P  | 44.0271884 | 33.5762802 | 42.5407318 |
| H | 46.7597389 | 30.3952036 | 39.4213152 | O  | 44.7432825 | 32.1338037 | 42.0816454 |
| H | 46.7661834 | 31.6165897 | 40.7047791 | O  | 45.4418125 | 34.3249834 | 42.7123957 |
| H | 49.1095211 | 32.0942642 | 40.4055508 | O  | 43.3878965 | 34.5155432 | 41.4608685 |
| O | 47.9984612 | 34.3606149 | 41.6271088 | P  | 43.1386958 | 35.4779242 | 44.6322849 |
| H | 47.1103454 | 34.3622541 | 42.0721146 | O  | 41.6323042 | 35.6227851 | 44.6581785 |
| H | 47.7732368 | 34.1363947 | 40.7000876 | O  | 43.9068887 | 36.5386732 | 43.8234576 |
| O | 43.2528283 | 31.2663113 | 40.5999115 | O  | 43.5709872 | 33.9945795 | 44.1748577 |
| H | 44.2695768 | 31.7429933 | 41.5423100 | P  | 43.2631754 | 34.8061958 | 47.5290372 |
| H | 43.3076420 | 31.9385946 | 39.8957159 | O  | 43.1837911 | 33.3166082 | 47.3459801 |
| O | 41.0373807 | 35.7046483 | 41.9635668 | O  | 44.0790730 | 35.4175608 | 48.6499902 |
| H | 41.1388600 | 35.5988749 | 42.9317531 | O  | 43.7376700 | 35.5822763 | 46.1521879 |
| H | 41.7652838 | 35.1357043 | 41.6329103 | O  | 41.6864143 | 35.3226146 | 47.6791793 |
| O | 42.3175725 | 32.5591604 | 42.4573728 | C  | 41.2562121 | 36.6546965 | 47.5264142 |
| H | 42.6604389 | 31.7508816 | 41.3697576 | N  | 49.4534045 | 30.9047174 | 38.6831492 |
| H | 42.2960169 | 32.0784192 | 43.2985614 | C  | 48.6713852 | 31.1439285 | 39.9451162 |
| H | 46.2790414 | 40.6475098 | 41.4930044 | C  | 48.8465145 | 29.9584328 | 40.9286575 |
| H | 44.6503657 | 35.4585940 | 36.3296863 | C  | 47.1679009 | 31.2942787 | 39.6868959 |
| H | 45.1863530 | 28.2953678 | 42.7048240 | O  | 48.8179430 | 28.8051002 | 40.4232184 |
| H | 41.7139918 | 37.1244763 | 46.6377474 | O  | 48.9083564 | 30.2539201 | 42.1370775 |
| H | 40.1967300 | 36.6344188 | 47.3523647 | C  | 46.7459819 | 32.3498222 | 38.6717461 |
| H | 41.4949203 | 37.2752808 | 48.3519665 | O  | 47.2599422 | 33.6298044 | 38.9992746 |

## IM

|   |            |            |            |   |            |            |            |
|---|------------|------------|------------|---|------------|------------|------------|
| C | 46.5180099 | 40.1564060 | 40.5498718 | H | 49.2517267 | 31.5959457 | 37.9248723 |
| H | 46.8554991 | 40.9572142 | 39.8785831 | H | 50.4867612 | 30.9392645 | 38.8436165 |
| H | 47.3695757 | 39.4803267 | 40.6758413 | H | 49.2517231 | 29.9641927 | 38.2937873 |
| C | 45.3681444 | 39.3613368 | 39.9381854 | H | 47.0786270 | 32.0580645 | 37.6632778 |
| H | 44.4300802 | 39.9333624 | 39.8565349 | H | 45.6438230 | 32.3935601 | 38.6509833 |
| H | 45.6504406 | 39.0558248 | 38.9142783 | H | 46.7635692 | 30.3165807 | 39.3688020 |
| C | 45.0532617 | 38.0693080 | 40.6676942 | H | 46.7083921 | 31.5318390 | 40.6605166 |
| O | 43.9318628 | 37.5142054 | 40.5408229 | H | 49.0538472 | 32.0674517 | 40.3979099 |
| O | 45.9403877 | 37.5326413 | 41.4193088 | O | 47.8650839 | 34.2905538 | 41.6032675 |
| C | 44.4378446 | 35.1835420 | 37.3586462 | H | 46.9777385 | 34.2246423 | 42.0498877 |
| H | 45.3411132 | 34.7219026 | 37.7790624 | H | 47.6543486 | 34.0665644 | 40.6732563 |
|   |            |            |            | O | 42.7717995 | 31.3725195 | 40.4445142 |
|   |            |            |            | H | 44.1062335 | 31.6560614 | 41.4745765 |

H 42.9391509 32.1391755 39.8619715  
 O 40.9721206 35.6727104 42.0025360  
 H 41.1309510 35.6512917 42.9699247  
 H 41.7452821 35.1665672 41.6670734  
 O 42.4556164 32.5817137 42.6678323  
 H 42.3961569 31.7770209 41.2830335  
 H 42.2825307 32.4036982 43.6116333  
 H 46.2706806 40.6075320 41.5107988  
 H 44.6312767 35.4461517 36.3186043  
 H 45.2117656 28.2164908 42.6827499  
 H 41.6902074 37.1600473 46.6636653  
 H 40.1758447 36.6678734 47.3825402  
 H 41.4837537 37.2941415 48.3792929

**PC**

C 46.4548665 40.0722190 40.5924048  
 H 46.8224526 40.8437289 39.9015321  
 H 47.2787590 39.3640260 40.7300381  
 C 45.2695296 39.3039312 40.0073303  
 H 44.3446299 39.8974290 39.9378758  
 H 45.5371200 38.9884298 38.9818675  
 C 44.9421478 38.0139679 40.7389480  
 O 43.7662829 37.5739640 40.7799504  
 O 45.8841194 37.3456157 41.2977878  
 C 44.6076185 35.2514017 37.2673948  
 H 45.5176758 34.7896604 37.6738322  
 H 44.4178860 36.1644366 37.8568857  
 C 43.4579341 34.2625008 37.4501965  
 O 43.6352600 33.1781230 38.0221096  
 N 42.2491273 34.6019932 36.9677009  
 H 41.5094405 33.8907164 36.9480801  
 H 42.1488566 35.4339583 36.3844861  
 C 45.0033849 29.3265711 43.2877374  
 H 45.3541676 29.0571341 44.3016621  
 H 45.7598867 30.0120040 42.8657796  
 O 43.7109268 29.8912215 43.3138206  
 H 43.7388780 30.8318811 43.0157528  
 Mg 44.5741035 35.9323714 41.9545539  
 P 44.3168765 33.2967857 41.5546916  
 O 44.7664993 32.3684325 40.3173563  
 O 45.5389862 33.9894380 42.2245889  
 O 43.4496401 34.4879443 41.0117667  
 P 43.0899805 35.3893907 44.6987049

O 41.6265396 35.7835141 44.5860831  
 O 44.0410276 36.2307860 43.8129091  
 O 43.3082304 33.8349821 44.5751802  
 P 43.2563253 34.8688815 47.6028537  
 O 43.2232840 33.3745248 47.4937311  
 O 44.0782121 35.5278307 48.6895691  
 O 43.6696466 35.6450398 46.2070941  
 O 41.6670137 35.3520405 47.7337690  
 C 41.2247695 36.6777861 47.5624555  
 N 49.7323310 30.8371390 38.5407092  
 C 48.9245276 31.0893289 39.7837979  
 C 49.0522522 29.9239611 40.8019395  
 C 47.4424795 31.2369217 39.4483983  
 O 48.9958649 28.7599441 40.3282343  
 O 49.1030734 30.2514968 42.0026224  
 C 47.0992602 32.3021787 38.4201268  
 O 47.5850078 33.5739103 38.8126938  
 H 48.0974626 34.0004025 38.0555738  
 H 49.5656306 31.5519625 37.7971554  
 H 50.7608791 30.8375580 38.7268384  
 H 49.4945900 29.9092410 38.1387658  
 H 47.4983095 32.0189261 37.4353254  
 H 46.0077549 32.3444547 38.3161498  
 H 47.0534892 30.2637665 39.1012479  
 H 46.9186006 31.4683931 40.3853325  
 H 49.2939100 32.0190751 40.2342990  
 O 48.1282819 34.2445935 41.4145902  
 H 47.2259041 34.1112191 41.7878272  
 H 47.9853446 34.0231548 40.4691545  
 O 41.7019797 32.1406542 40.3390302  
 H 44.3730005 32.6852617 39.4668418  
 H 42.0458125 33.0127282 40.0899797  
 O 40.9454480 35.2129212 42.0397882  
 H 41.1704429 35.4440243 42.9726978  
 H 41.7948696 34.9161020 41.6520351  
 O 43.4976774 32.3884516 42.5063725  
 H 42.1026413 32.0301756 41.2242866  
 H 43.2536180 33.2780215 43.7275634  
 H 46.2338947 40.5555075 41.5440722  
 H 44.7807982 35.5034968 36.2211997  
 H 45.0198098 28.4280002 42.6709978  
 H 41.6529844 37.1769028 46.6932135  
 H 40.1438565 36.6815389 47.4221696  
 H 41.4525948 37.3250858 48.409312

**WT-Homoserine                      kinase-previous  
proposed mechanism including H138**

**RC**

|    |            |            |            |
|----|------------|------------|------------|
| C  | 48.3190864 | 35.8048849 | 42.1758109 |
| H  | 48.7415948 | 34.8483557 | 41.8381451 |
| H  | 49.0398915 | 36.2689038 | 42.8714161 |
| C  | 47.0070476 | 35.5811106 | 42.9274028 |
| O  | 46.3261613 | 36.5281684 | 43.3316514 |
| N  | 46.6948892 | 34.2975119 | 43.1416893 |
| H  | 45.8619132 | 34.1166959 | 43.7324966 |
| H  | 47.3098574 | 33.5561871 | 42.8037211 |
| C  | 44.5316700 | 40.0772546 | 47.0435591 |
| H  | 45.3623646 | 40.3562277 | 47.7062426 |
| H  | 43.7623277 | 40.8587411 | 47.1738895 |
| C  | 43.8833268 | 38.7736858 | 47.5624559 |
| O  | 43.4816228 | 37.9095232 | 46.7067487 |
| O  | 43.6889931 | 38.6778452 | 48.7872471 |
| C  | 33.7463232 | 36.8457044 | 42.9353966 |
| H  | 33.3615550 | 37.8585876 | 42.7816052 |
| H  | 34.3442115 | 36.8646255 | 43.8586003 |
| C  | 34.6640830 | 36.4425633 | 41.7846600 |
| H  | 34.1272469 | 36.1923622 | 40.8524501 |
| H  | 35.3284804 | 37.2828154 | 41.5251059 |
| C  | 35.5734478 | 35.2757130 | 42.1118680 |
| O  | 36.4151026 | 34.8780162 | 41.2454153 |
| O  | 35.4824250 | 34.6845702 | 43.2238122 |
| C  | 37.7592012 | 40.5732130 | 44.9582385 |
| H  | 38.6743702 | 41.1502930 | 44.7514962 |
| H  | 37.6166806 | 40.6131920 | 46.0510416 |
| C  | 37.9216089 | 39.1674647 | 44.4579287 |
| N  | 39.1415348 | 38.6785641 | 44.0531006 |
| H  | 40.0330998 | 39.2062043 | 44.0508783 |
| C  | 38.9758664 | 37.3845475 | 43.6908591 |
| H  | 39.7946491 | 36.7364605 | 43.3863382 |
| N  | 37.7131501 | 37.0041566 | 43.8142868 |
| C  | 37.0470600 | 38.1075545 | 44.2947670 |
| H  | 35.9858600 | 38.0652311 | 44.5293679 |
| C  | 42.3354441 | 40.9110569 | 41.5412581 |
| H  | 43.2908673 | 40.6632565 | 41.0554621 |
| H  | 42.4116495 | 41.9185492 | 41.9780554 |
| C  | 42.0389113 | 39.8911459 | 42.6575424 |
| O  | 41.3600599 | 40.3072817 | 43.6409615 |
| O  | 42.4974006 | 38.7300561 | 42.5255951 |
| Mg | 36.8493100 | 33.2955000 | 42.5160820 |
| P  | 38.6476186 | 31.4022114 | 42.5171967 |

|   |            |            |            |
|---|------------|------------|------------|
| O | 39.9982681 | 30.7516592 | 42.4942181 |
| O | 38.2299609 | 32.2789783 | 43.7568107 |
| O | 38.2244690 | 32.2847295 | 41.2975853 |
| P | 35.9468004 | 30.3721143 | 42.0933991 |
| O | 35.6701256 | 29.9786906 | 40.6578763 |
| O | 35.5114609 | 31.7857453 | 42.5170898 |
| O | 37.5139113 | 30.1552956 | 42.4668031 |
| P | 35.3366798 | 27.7205875 | 43.3037508 |
| O | 36.7475474 | 27.2285691 | 43.1818577 |
| O | 34.5152543 | 27.3285413 | 44.5022886 |
| O | 35.2183507 | 29.3665544 | 43.1453370 |
| O | 34.5388007 | 27.2308062 | 41.9316701 |
| C | 33.3036756 | 27.7761407 | 41.5429468 |
| N | 43.6163309 | 36.7530292 | 44.3132477 |
| C | 42.7331373 | 35.5697538 | 44.5303878 |
| C | 43.4786998 | 34.4525956 | 45.2935975 |
| C | 42.2206083 | 35.0230534 | 43.1935187 |
| O | 42.8583833 | 33.8813141 | 46.2058577 |
| O | 44.6379555 | 34.1675710 | 44.8801717 |
| C | 41.2520194 | 33.8527860 | 43.3297551 |
| O | 40.1474548 | 34.2252206 | 44.1374725 |
| H | 39.4775182 | 33.5051064 | 44.0838688 |
| H | 43.1780282 | 37.4391367 | 43.6574730 |
| H | 43.7376049 | 37.2672617 | 45.2370383 |
| H | 44.5577698 | 36.4858530 | 43.9510239 |
| H | 40.9204260 | 33.5603710 | 42.3167947 |
| H | 41.7744313 | 32.9761805 | 43.7533559 |
| H | 41.7508336 | 35.8479399 | 42.6299389 |
| H | 43.0878442 | 34.6764986 | 42.6090158 |
| H | 41.8892798 | 35.9084623 | 45.1454290 |
| H | 48.2155766 | 36.4717336 | 41.3198519 |
| H | 44.8832267 | 40.0785242 | 46.0118259 |
| H | 32.9064064 | 36.1707522 | 43.0998547 |
| H | 36.9070161 | 41.0993572 | 44.5280988 |
| H | 41.5732392 | 40.9874198 | 40.7658359 |
| H | 33.3399218 | 28.8560222 | 41.3993876 |
| H | 33.0216517 | 27.3365535 | 40.5862375 |
| H | 32.4873474 | 27.5897915 | 42.2407643 |

**TS**

|   |            |            |            |
|---|------------|------------|------------|
| C | 48.1822859 | 35.7751221 | 42.2260627 |
| H | 48.6075936 | 34.8192271 | 41.8923232 |
| H | 48.8949093 | 36.2308464 | 42.9353365 |
| C | 46.8551296 | 35.5501071 | 42.9562790 |
| O | 46.1549800 | 36.4865373 | 43.3482651 |





|    |            |            |            |   |            |            |            |
|----|------------|------------|------------|---|------------|------------|------------|
| H  | 33.9820320 | 36.1674146 | 40.7558617 | H | 44.7880142 | 36.7270574 | 44.0408957 |
| H  | 35.3353585 | 37.0725654 | 41.4207419 | H | 41.9909717 | 33.7882572 | 41.6039895 |
| C  | 35.3890358 | 35.0145282 | 41.8775983 | H | 42.5436899 | 33.1342403 | 43.1551827 |
| O  | 35.9224625 | 34.4575081 | 40.8670938 | H | 42.4164876 | 36.0988063 | 42.3055053 |
| O  | 35.5154587 | 34.5346730 | 43.0346855 | H | 43.8691997 | 35.0926437 | 42.5278649 |
| C  | 37.7660074 | 40.5660034 | 44.9599756 | H | 41.9859014 | 36.0028698 | 44.7567074 |
| H  | 38.6775501 | 41.1568975 | 44.7768019 | H | 48.2699118 | 36.4959352 | 41.2758667 |
| H  | 37.6124179 | 40.5754843 | 46.0520213 | H | 44.9334363 | 40.1389381 | 46.0634420 |
| C  | 37.9399449 | 39.1761392 | 44.4199228 | H | 32.9139430 | 36.1193220 | 43.0882149 |
| N  | 39.1590015 | 38.7092551 | 43.9851748 | H | 36.9140839 | 41.0969080 | 44.5352007 |
| H  | 40.0480632 | 39.2326235 | 44.0121717 | H | 41.5404215 | 40.8963555 | 40.7215543 |
| C  | 38.9900278 | 37.4307793 | 43.5613617 | H | 33.3656653 | 28.8551342 | 41.4461747 |
| H  | 39.8040483 | 36.8079305 | 43.1899577 | H | 33.0596339 | 27.3434882 | 40.6209822 |
| N  | 37.7299730 | 37.0450496 | 43.6790495 | H | 32.5210018 | 27.5797506 | 42.2746056 |
| C  | 37.0674129 | 38.1211312 | 44.2174200 |   |            |            |            |
| H  | 36.0068948 | 38.0647400 | 44.4564396 |   |            |            |            |
| C  | 42.3300051 | 40.8667579 | 41.4723865 |   |            |            |            |
| H  | 43.2741775 | 40.6124964 | 40.9674125 |   |            |            |            |
| H  | 42.4025665 | 41.8946487 | 41.8606793 |   |            |            |            |
| C  | 42.0988431 | 39.9001275 | 42.6470192 |   |            |            |            |
| O  | 41.4298233 | 40.3320955 | 43.6262051 |   |            |            |            |
| O  | 42.6087700 | 38.7525490 | 42.5636719 |   |            |            |            |
| Mg | 36.6193662 | 32.9352856 | 42.1921380 |   |            |            |            |
| P  | 39.6337061 | 32.9684285 | 42.9895183 |   |            |            |            |
| O  | 40.3627070 | 31.7409734 | 42.4888402 |   |            |            |            |
| O  | 39.0696727 | 32.7574148 | 44.5032488 |   |            |            |            |
| O  | 38.4952705 | 33.5644451 | 42.1796147 |   |            |            |            |
| P  | 35.8432582 | 30.4336815 | 42.0449726 |   |            |            |            |
| O  | 35.6829677 | 29.7919900 | 40.6638715 |   |            |            |            |
| O  | 34.9876543 | 31.7214356 | 42.2424539 |   |            |            |            |
| O  | 37.2672805 | 30.9114344 | 42.4184096 |   |            |            |            |
| P  | 35.3972195 | 27.7517144 | 43.3232352 |   |            |            |            |
| O  | 36.8066588 | 27.2418519 | 43.1712331 |   |            |            |            |
| O  | 34.6087440 | 27.3155257 | 44.5355967 |   |            |            |            |
| O  | 35.2775036 | 29.3721321 | 43.1956945 |   |            |            |            |
| O  | 34.5718359 | 27.2264922 | 41.9706935 |   |            |            |            |
| C  | 33.3401483 | 27.7739790 | 41.5822607 |   |            |            |            |
| N  | 43.8231013 | 36.9432712 | 44.3759294 |   |            |            |            |
| C  | 42.9681768 | 35.7261836 | 44.3521131 |   |            |            |            |
| C  | 43.5600393 | 34.5895181 | 45.2143377 |   |            |            |            |
| C  | 42.8454875 | 35.2717502 | 42.8954644 |   |            |            |            |
| O  | 42.7986664 | 34.0077498 | 46.0235896 |   |            |            |            |
| O  | 44.7593760 | 34.2863110 | 45.0009174 |   |            |            |            |
| C  | 42.0485715 | 34.0007233 | 42.6846783 |   |            |            |            |
| O  | 40.7443049 | 34.1721039 | 43.2299544 |   |            |            |            |
| H  | 39.5423703 | 33.2653908 | 45.2136876 |   |            |            |            |
| H  | 43.3978161 | 37.6602818 | 43.7390125 |   |            |            |            |
| H  | 43.8549326 | 37.3835440 | 45.3505479 |   |            |            |            |
